# Supplementary material for: A RuII,III2 diphosphonato complex with a metal–metal bond for water oxidation
Source: Royal Society of Chemistry journal article supplement (doi:10.1039/d0dt04150e), 2021-01-01
Supplement: d0dt04150e1.pdf [file d0dt04150e1.pdf]

Electronic Supplementary Information

## **Ru<sub>2</sub><sup>II,III</sup> diphosphonato complex with metal-metal bond for water oxidation**

Guo Chen,<sup>a</sup> Ting Fan,<sup>b</sup> Bin Liu,<sup>a</sup> Meng Xue,<sup>a</sup> Jing-Jing Wei,<sup>a</sup> Shi-Rui Kang,<sup>a</sup> Hai-Xia Tong<sup>c</sup>  
and Xiao-Yi Yi<sup>\*a</sup>

<sup>a</sup> College of Chemistry and Chemical Engineering, Hunan Provincial Key Laboratory of Chemical Power Sources, Hunan Provincial Key Laboratory of Efficient and Clean Utilization of Manganese Resources, Central South University, Changsha, Hunan 410083, P. R. China.

<sup>b</sup> School of Chemistry and Chemical Engineering, South China University of Technology, Guangzhou, Guangdong 510641, P. R. China.

<sup>c</sup> School of Chemistry and Food Engineering, Changsha University of Science and Technology, Changsha, Hunan 410114, P. R. China.

\* Corresponding authors: Fax: 86 731 88879616; Tel: 86 731 88879616;

E-mail addresses: [xyyi@csu.edu.cn](mailto:xyyi@csu.edu.cn)



## Experimental Section

**General considerations.**  $K_3[Ru_2(hedp)_2(H_2O)_2]$  ( $K_3\cdot 1$ ) was prepared according to our previous work.<sup>S1,S2</sup> All of other chemicals were obtained from J&K Scientific. DI water was employed throughout the whole study for preparing a series of solutions. The UV-visible spectroscopic titration was performed with a spectrophotometer Cary 8454. Infrared spectra (KBr) were recorded on Nicolet 6700 spectrometer FT-IR spectrophotometer. Electrochemical measurements were accomplished with a CHENHUA CHI660E. Measurements of pH values were carried out on a INESA PHS-3C pH meter. Gas quantifications were conducted with a Shimadzu GC-2014 gas chromatograph. XRD crystallography studies were carried out at the Bruker Smart ApexII CCD diffractometer (Mo  $K\alpha$  radiation). ESI-MS was performed in a Bruker Daltonik GmbH, Bremen mass spectrometer equipped with an electrospray ionization (ESI) source.

**Oxygen evolution measurements.** 100 equiv. of CAN (10 mM, 5 mL) was purged with Ar for 20 min, catalyst  $K_3\cdot 1$  (5 mM, 100  $\mu$ L) was immediately injected to the above solution under vigorous stirring. The oxygen amount was measured by GC experiment, which performed on a Shimadzu GC-2014 gas chromatograph. Ar was used as the carrier gas. 200  $\mu$ L volumes of headspace mixture were manually injected to the GC using a gastight syringe (SGE Analytical Science).

**Electrochemical measurements.** The typical three-electrode cell was employed, including a Ag/AgCl electrode, a Pt wire, and a glassy carbon electrode (GCE), which were used as the reference electrode, the counter electrode, and the working electrode with a diameter of 3 mm, respectively. All potentials are reported versus Ag/AgCl electrode in saturated KCl. Cyclic voltammetry (CV) chronoamperometry and differential pulse voltammogram (DPV) were measured using 1 mM solutions of  $K_3\cdot 1$ . The scan rate in all CV experiments was 100 mVs<sup>-1</sup>. The current of chronoamperometry (CA) was tested at the overpotential of 1.50 V (vs.

NHE). The 0.1 M pH 1.0 HNO<sub>3</sub> solution and 0.1 M pH 7.0 PBS were employed as electrolyte, respectively.

The diffusion coefficient ( $D_{Ru}$ ) was determined from the dependence of the  $i_p$  on  $v^{1/2}$  based on the Randles–Sevcik relation:

$$i_p = 0.446nFAC_{cat}\sqrt{nFvD_{Ru}/RT} \quad (\text{eqn. 1})$$

where  $n$  is the number of transferred electrons ( $1e^-$ ),  $F$  is the Faraday constant,  $A$  is the area of the working electrode ( $0.07065 \text{ cm}^2$ ),  $C_{cat}$  is the concentration of the catalyst ( $\text{mol L}^{-1}$ ),  $D_{Ru}$  is the catalyst diffusion coefficient ( $\text{cm}^2 \text{ s}^{-1}$ ),  $R$  is the ideal gas constant and  $T$  is the temperature (K).<sup>S3,S4</sup>

The rate constant ( $k_{cat}$ ) was determined by linear fitting of  $i_{cat}/i_p$  with  $v^{-1/2}$  based on the following equation:

$$i_{cat}/i_p = 2.242n_{cat}\sqrt{k_{cat}RT/nFv} \quad (\text{eqn. 2})$$

where  $n_{cat}$  is the number of electrons involved in water oxidation (4),  $k_{cat}$  is the rate constant for water oxidation ( $\text{s}^{-1}$ ),  $R$  is the ideal gas constant,  $T$  is the temperature (K),  $n$  is the number of electrons transferred ( $1e^-$ ),  $F$  is the Faraday constant and  $v$  is the scan rate ( $\text{V s}^{-1}$ ).<sup>S3,S4</sup>

**Redox titration.** UV-visible spectra were taken after every addition of 5  $\mu\text{L}$  (NH<sub>4</sub>)[Ce(NO<sub>3</sub>)<sub>6</sub>] (CAN, 12.5 mM in 0.1 M HNO<sub>3</sub>) solution to 2.0 mL K<sub>3</sub>·1 (0.5 mM in 0.1 M HNO<sub>3</sub>). The absorbances at  $\lambda = 320 \text{ nm}$  were plotted against the ratio of mol of CAN to mol of K<sub>3</sub>·1.

**Gas Chromatography (GC) methods.** Gas quantification was performed using a molecular sieve column attached to a thermal conductivity detector. Ar was used as the carrier gas. Standard curves were generated by direct injection of calibrating gas. 200  $\mu\text{L}$  volumes of headspace mixture were manually injected to the GC using a gastight syringe (SGE Analytical Science).

**X-Ray Crystallography.** The measurement of the crystals was performed using a Bruker Smart ApexII CCD diffractometer using graphite-mono-chromated Mo K $\alpha$  radiation from an X-ray tube. The collected frames were processed with the software SAINT. The absorption correction was treated with SADABS. Structures were solved using direct methods with SHELXS or SHELXT and refined against  $F^2$  on all data by full-matrix least squares with SHELXL.<sup>55</sup> The atomic positions of non-hydrogen atoms were refined with anisotropic parameters. The hydrogen atoms were introduced at their geometric positions and refined as riding atoms.

**ESI-MS spectra.** The given CAN solution (0.5 M in 0.1 HNO<sub>3</sub>) was injected into K<sub>3</sub>1 solution (0.5 mM in 0.1 M HNO<sub>3</sub>, 2 mL), and the mixture was stirred for 5 min. ESI-MS spectra was measured. The experimental parameters were as follows: capillary temperature, 200 °C; capillary voltage, 3500 V; flow rate, 4 L/min; hexapole, 400 Vpp.

**DFT calculation.** All the calculations were performed with Gaussian09 software via DFT methods.<sup>56</sup> Geometry optimizations were carried out under B3LYP functional<sup>57</sup> with SDD basis set<sup>58</sup> for Ru and P and 6-31G\*\* basis set for C, H and O. Additional polarization f exponent ( $\zeta_f = 1.235$ ) was added for Ru, and d exponent ( $\zeta_d = 0.387$ ) was added for P.<sup>59</sup> Frequency calculations were carried out at the same level to get the free energy and to verify the geometries corresponding to minima. And single-point energy corrections were performed at the M06 functional<sup>510</sup> with 6-311++G\*\* basis set for C, H and O except for Ru and P. All calculated solvation free energies use a standard state of ideal gas (1 M, 298.15 K, 1atm) dissolving as an ideal dilute solution (1 M), but for water, the standard state for water solvent is 55.6 M. Thus the concentration correction of 1.9 kcal/mol was added for all the species except for water, for which 4.3 kcal/mol is added. The standard redox potential of hydrogen electrode is 4.281 V and the corresponding reference free energy of solvation of a proton is -1101 kJ/mol.<sup>511</sup> The calculated energies and coordinates are shown in table S2.

In our calculation, we failed to coordinate water molecule to the Ru center of

catalyst **1**<sup>3-</sup>. This suggests that the interaction between H<sub>2</sub>O and Ru center in **1**<sup>3-</sup> is very weak which explains why the Ru-OH<sub>2</sub> bond in the crystal structure of K<sub>3</sub>·**1** (2.31 Å) is much larger than those in other Ru-based catalysts (2.136Å for [(bpy)<sup>2-</sup>(OH<sub>2</sub>)Ru<sup>III</sup>ORu<sup>III</sup>(OH<sub>2</sub>)(bpy)<sub>2</sub>]<sup>4+</sup>, bpy = 2,2'-bipyridine;<sup>S12</sup> 2.100Å for [Ru<sup>II</sup>-(CO)<sub>3</sub>(H<sub>2</sub>O)<sub>3</sub>]<sup>2+</sup>;<sup>S13</sup> 2.198(5)Å for [Ru<sup>II</sup>(dppe)(CO)(O<sub>3</sub>SCF<sub>3</sub>)<sub>2</sub>(OH<sub>2</sub>)],<sup>S14</sup> dppe = 1,2-bis(diphenylphosphino)ethylene). Therefore, only two explicit water molecules, one on each side of catalyst **1**<sup>3-</sup>, were included in our calculation. Other solvent effect of water was estimated by single-point calculations using SMD continuum solvation model<sup>S15</sup> based on gas-phase optimized structures.

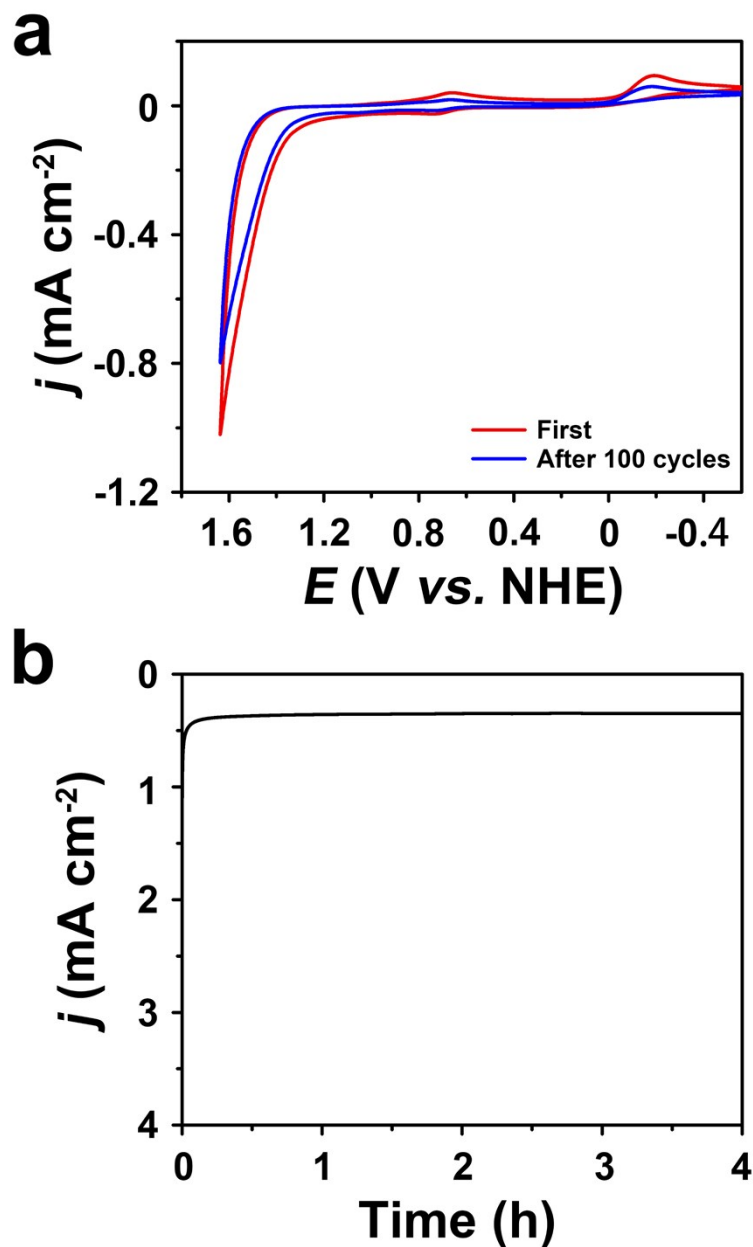

**Fig. S1** (a) CVs of  $K_3\cdot 1$  (1.0 mM) in 0.1 M pH 7 PBS at a scan rate of 100 mV s<sup>-1</sup>. (b) Chronoamperometric response of  $K_3\cdot 1$  (1.0 mM) at a constant potential of 1.50 V (vs. NHE) in 0.1 M pH 7.0 PBS.

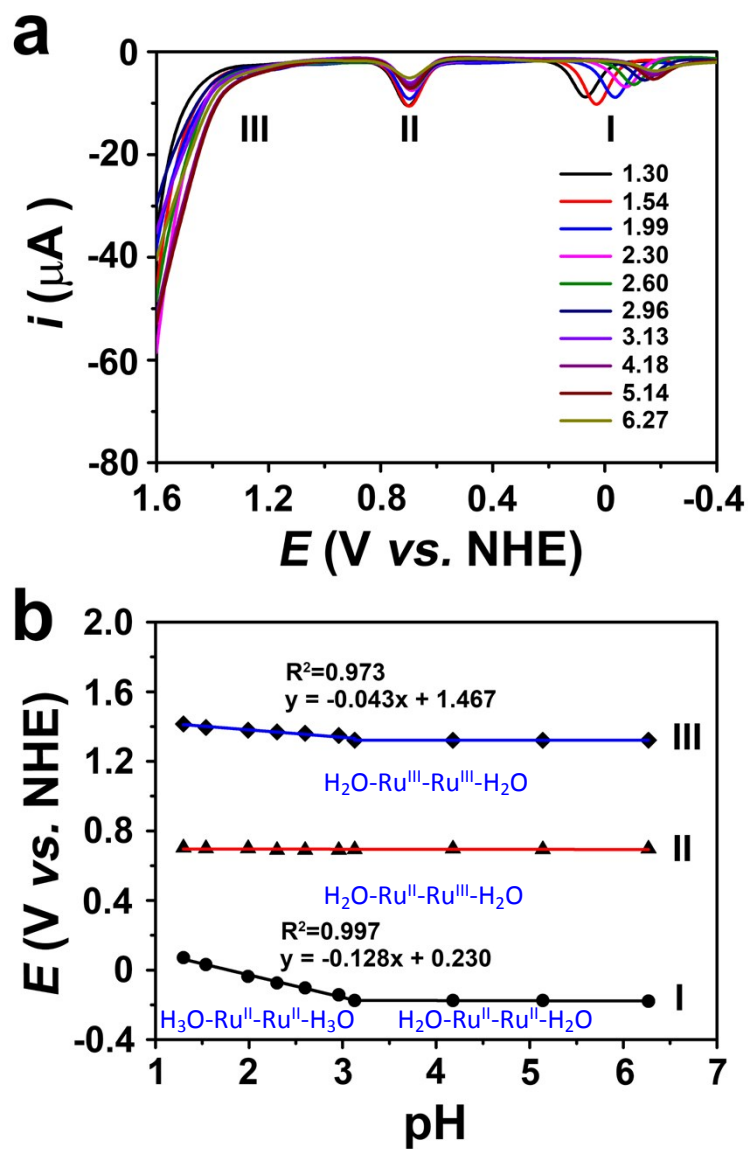

**Fig. S2** (a) DPVs of  $K_3 \cdot 1$  (1.0 mM) in 0.1 M  $HNO_3$  with pH varied from 1.30 to 6.27. (b) Pourbaix diagram for I ( $Ru_2^{5+}/Ru_2^{4+}$ ), II ( $Ru_2^{6+}/Ru_2^{5+}$ ) and III (onset potential).



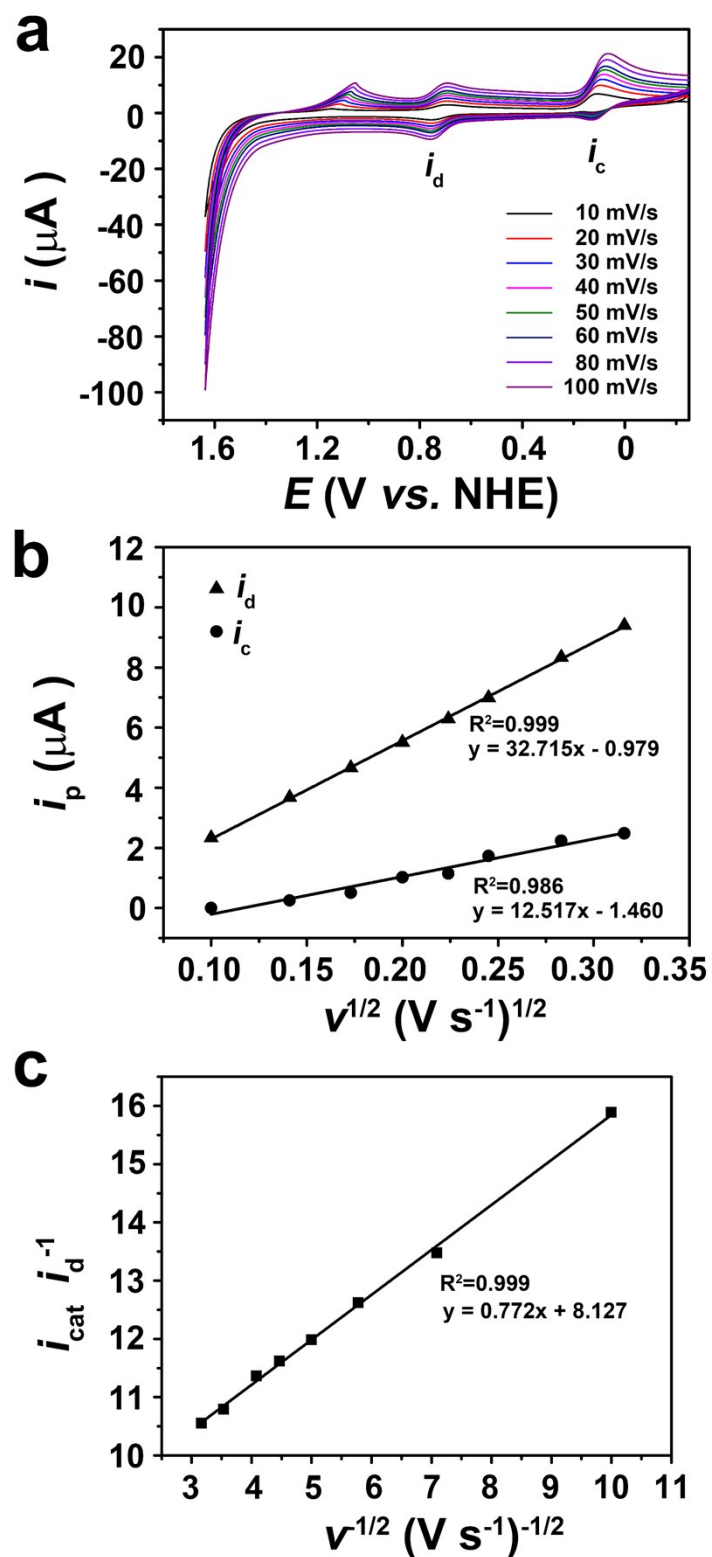

**Fig. S3** (a) CVs of  $\text{K}_3\cdot\mathbf{1}$  (1.0 mM) in 0.1 M  $\text{HNO}_3$  with scan rate varying from 10 to 100  $\text{mV s}^{-1}$ . (b) Plot of the anodic current maximum of the  $i_c$  ( $\text{Ru}_2^{5+}/\text{Ru}_2^{4+}$ ) and  $i_d$  ( $\text{Ru}_2^{6+}/\text{Ru}_2^{5+}$ ) couples as a function of the square root of scan rate. (c) Plot of  $i_{\text{cat}}/i_p$  vs.  $v^{1/2}$  at 1.64 V (vs. NHE).

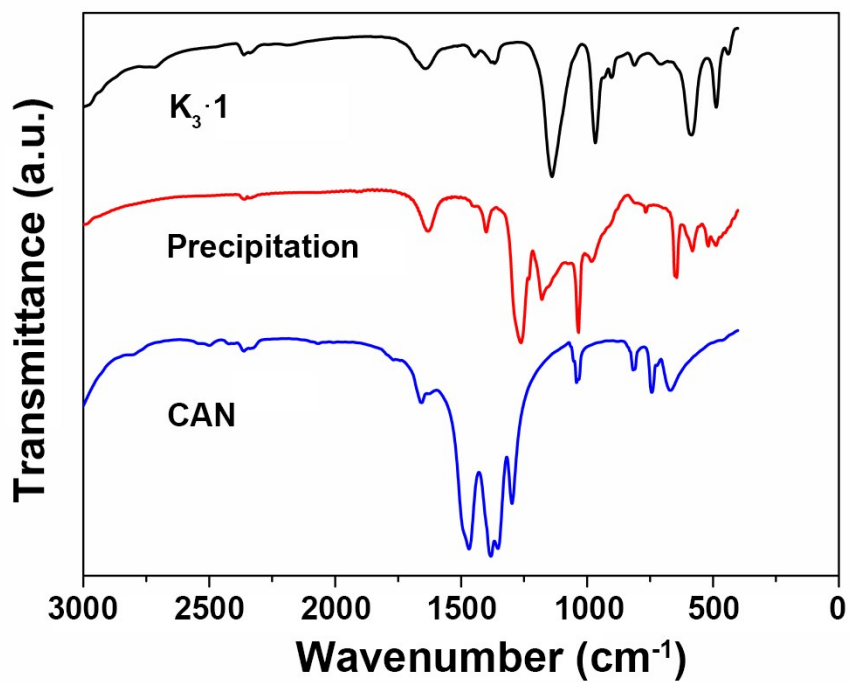

**Fig. S4** IR spectra of K<sub>3</sub>.1, brown precipitate and CAN.

**Table S1.** The element analysis of brown precipitate by the inductively coupled plasma spectrum

|               | Ce     | Ru    | P     |
|---------------|--------|-------|-------|
| Content (wt%) | 17.7 % | 3.7 % | 4.8 % |

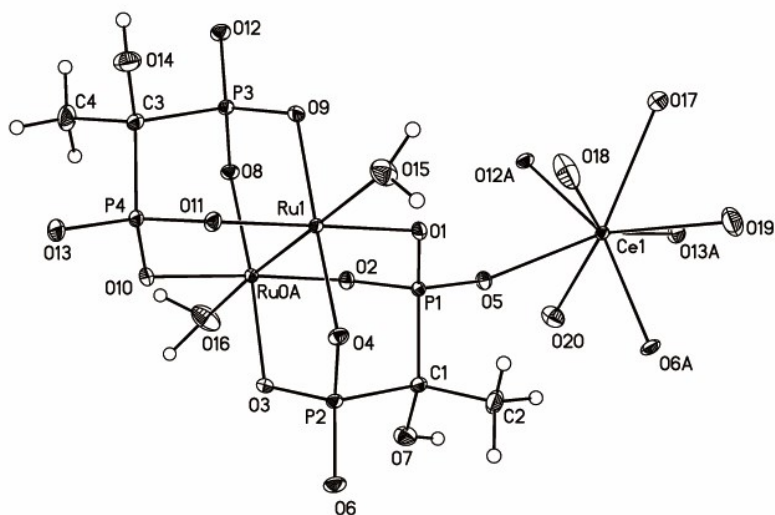

**Fig. S5** The X-ray structure of  $[\text{Ce}^{\text{III}}(\text{H}_2\text{O})_4][\mathbf{1}] \cdot 4\text{H}_2\text{O}$  and crystallographic data.

**Table S2.** Crystallographic data of  $[\text{Ce}^{\text{III}}(\text{H}_2\text{O})_4][\mathbf{1}] \cdot 4\text{H}_2\text{O}$

| compound                                       | $[\text{Ce}^{\text{III}}(\text{H}_2\text{O})_4][\mathbf{1}] \cdot 4\text{H}_2\text{O}$ |
|------------------------------------------------|----------------------------------------------------------------------------------------|
| Empirical formula                              | $\text{C}_4\text{H}_{20}\text{CeKO}_{24}\text{P}_4\text{Ru}_2$                         |
| Fw                                             | 918.34                                                                                 |
| Crystal system                                 | monoclinic                                                                             |
| Space group                                    | $\text{P}2_1/\text{c}$                                                                 |
| $a/\text{\AA}$                                 | 12.8558(19)                                                                            |
| $b/\text{\AA}$                                 | 12.808(2)                                                                              |
| $c/\text{\AA}$                                 | 17.015(2)                                                                              |
| $\alpha/^\circ$                                | 90                                                                                     |
| $\beta/^\circ$                                 | 118.539(8)                                                                             |
| $\gamma/^\circ$                                | 90                                                                                     |
| $V/\text{\AA}^3$                               | 2461.2(6)                                                                              |
| Z                                              | 4                                                                                      |
| $2\theta$ range for data collection/ $^\circ$  | 3.606 to 55.376                                                                        |
| Reflections collected/unique                   | 41788/ 5704                                                                            |
| F(000)                                         | 1768.0                                                                                 |
| $\rho_{\text{calcd}}$ ( $\text{g cm}^{-3}$ )   | 2.478                                                                                  |
| $\mu$ (Mo $\text{K}\alpha$ )/ $\text{mm}^{-1}$ | 10.692                                                                                 |
| $R_1/wR_2$ ( $I > 2\sigma(I)$ ) <sup>a</sup>   | 0.0191 / 0.0445                                                                        |
| $R_1, wR_2$ (all data)                         | 0.0230/0.0461                                                                          |

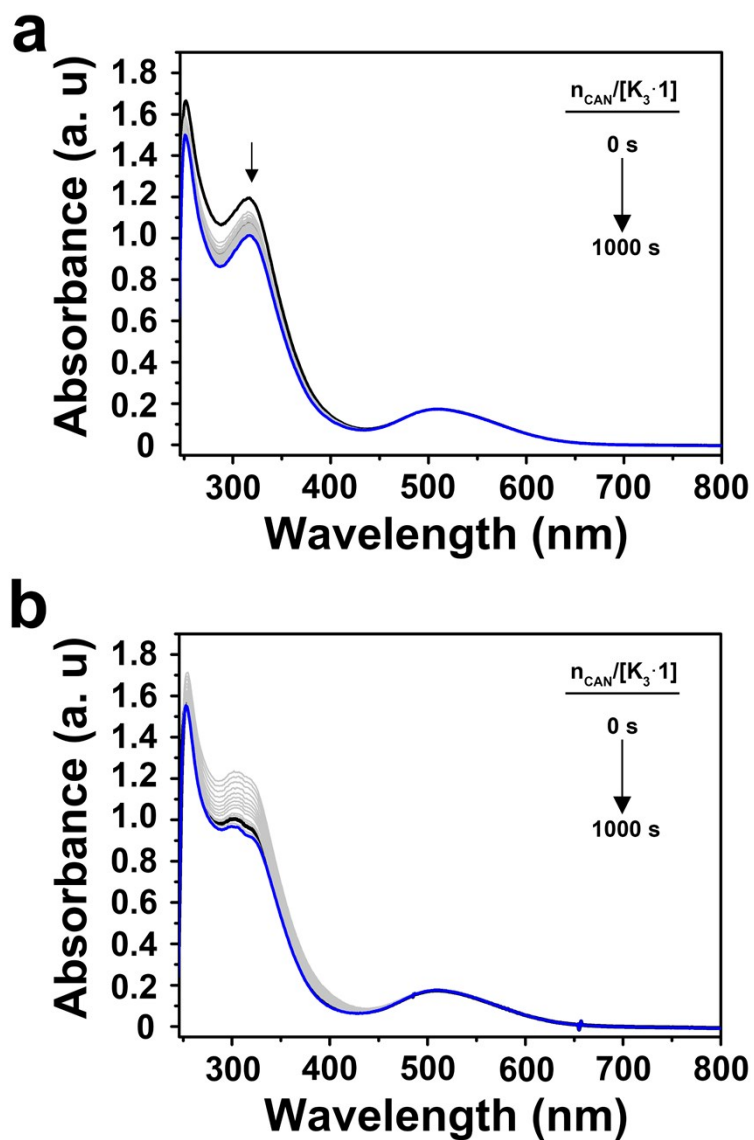

**Fig. S6** (a) UV-visible spectral change of  $K_3 \cdot 1$  after addition of 3 equiv. of CAN within 3 min, time interval of spectral change = 40 s. (b) UV-visible spectral change of  $K_3 \cdot 1$  after direct addition of 4 equiv. of CAN, time interval of spectral change = 40 s. t=0 (black line), t=1000 s (blue line).

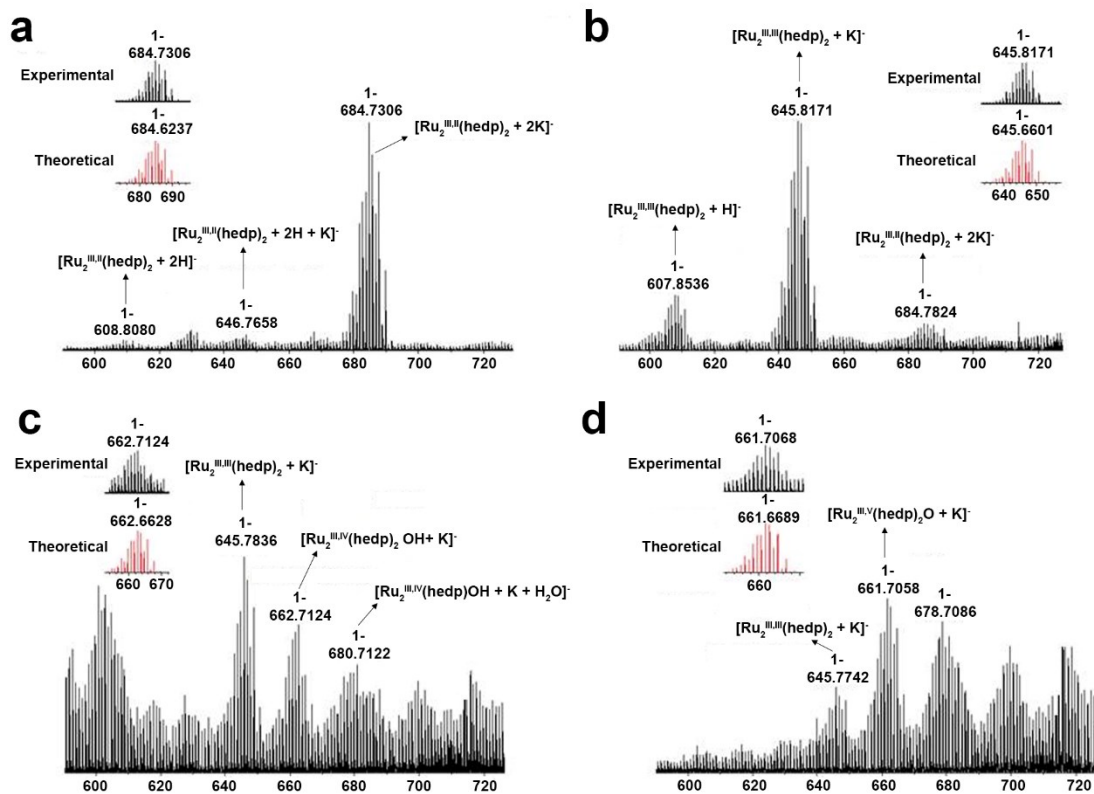

**Fig. S7** ESI-MS spectra of  $K_3 \cdot \mathbf{1}$  upon addition of 0-3 equiv. of CAN. (a)  $K_3 \cdot \mathbf{1}$ ; (b)  $K_3 \cdot \mathbf{1}$  and 1 equiv. of CAN; (c)  $K_3 \cdot \mathbf{1}$  and 2 equiv. of CAN; (d)  $K_3 \cdot \mathbf{1}$  and 3 equiv. of CAN.

**Table S3.** The calculated energies at b3lyp level, solvent energies and the single-point energies at M06 level.

| Species       | Multiplicity | E (a.u.)     | G (a.u.)     | Esol (a.u.)  | Em06 (a.u.)  |
|---------------|--------------|--------------|--------------|--------------|--------------|
| H2ORu3-Ru2H2O | 2            | -2918.865647 | -2918.695498 | -2919.443817 | -2918.484371 |
|               | 4            | -2918.887736 | -2918.71868  | -2919.460781 | -2918.505455 |
| H2ORu3-Ru3H2O | 1            | -2918.946711 | -2918.775642 | -2919.258419 | -2918.547243 |
|               | 3            | -2918.973977 | -2918.805759 | -2919.282172 | -2918.568799 |
|               | 5            | -2918.99516  | -2918.99516  | -2919.305421 | -2918.590973 |
| H2ORu3-Ru4OH  | 2            | -2918.319267 | -2918.162617 | -2918.630218 | -2917.904594 |
|               | 4            | -2918.336396 | -2918.179922 | -2918.655727 | -2917.921733 |
|               | 6            | -2918.338698 | -2918.183099 | -2918.667413 | -2917.925268 |
| HORu4-Ru4OH   | 1            | -2917.693905 | -2917.543308 | -2918.002777 | -2917.270666 |
|               | 3            | -2917.699761 | -2917.552363 | -2918.009138 | -2917.275048 |
|               | 5            | -2917.70916  | -2917.561267 | -2918.013169 | -2917.285064 |
| H2ORu3-Ru5O   | 1            | -2917.663572 | -2917.515913 | -2917.96647  | -2917.256241 |
|               | 3            | -2917.692728 | -2917.547613 | -2918.017035 | -2917.273531 |
|               | 5            | -2917.685694 | -2917.541583 | -2918.014637 | -2917.263514 |
| H2ORu3-Ru3OOH | 1            | -2993.368238 | -2993.206673 | -2993.917918 | -2992.973371 |
|               | 3            | -2993.398656 | -2993.239024 | -2993.96169  | -2992.996458 |
|               | 5            | -2993.408456 | -2993.248762 | -2993.970756 | -2993.007235 |
| H2ORu3-Ru4OO  | 2            | -2992.773307 | -2992.625532 | -2993.33867  | -2992.348854 |
|               | 4            | -2992.784251 | -2992.63704  | -2993.346249 | -2992.350159 |
|               | 6            | -2992.779236 | -2992.632967 | -2993.343215 | -2992.376563 |
| H2O           | 1            | -76.41815901 | -76.414431   | -76.43051144 | -76.41785716 |
| O2            | 3            | -150.316605  | -150.332809  | -150.3170769 | -150.2908496 |

## Coordinates

|                 |           |           |           |                 |           |           |           |
|-----------------|-----------|-----------|-----------|-----------------|-----------|-----------|-----------|
| H2ORu3-Ru2H2OM2 |           |           |           | 1               | -5.134712 | 1.043743  | 0.447592  |
| 44              | -0.112588 | 0.169227  | 1.072599  | 6               | -3.449162 | -0.022102 | -0.368263 |
| 15              | 2.411273  | 1.556666  | 0.019317  | 8               | -1.299529 | -1.637407 | -1.168626 |
| 15              | 2.395318  | -1.525794 | 0.559574  | 8               | -1.623288 | -1.268789 | 1.351065  |
| 6               | 4.498819  | -0.198264 | -0.733664 | 8               | -3.410559 | -2.713120 | -0.043096 |
| 1               | 4.041494  | -0.409267 | -1.703024 | 8               | -1.262278 | 1.187441  | -1.655972 |
| 1               | 5.108638  | 0.708559  | -0.826683 | 8               | -1.578235 | 1.587882  | 0.852504  |
| 1               | 5.134610  | -1.043802 | -0.447918 | 8               | -3.252801 | 2.742625  | -0.841056 |
| 6               | 3.449198  | 0.022090  | 0.368169  | 8               | -4.151225 | -0.304548 | -1.601958 |
| 8               | 1.299589  | 1.637420  | 1.168641  | 1               | -4.273940 | -1.269872 | -1.560265 |
| 8               | 1.623298  | 1.268837  | -1.351052 | 8               | 2.233759  | -0.560119 | -3.426301 |
| 8               | 3.410626  | 2.713112  | 0.043088  | 1               | 2.154715  | -1.206029 | -2.698120 |
| 8               | 1.262333  | -1.187389 | 1.656028  | 1               | 2.177538  | 0.272032  | -2.914319 |
| 8               | 1.578244  | -1.587909 | -0.852431 |                 |           |           |           |
| 8               | 3.252835  | -2.742609 | 0.841128  | H2ORu3-Ru2H2OM4 |           |           |           |
| 8               | 4.151443  | 0.304551  | 1.601754  | 44              | 5.286433  | 13.617698 | -0.513698 |
|                 |           |           |           | 15              | 2.328959  | 13.780796 | -1.342428 |
| 1               | 4.274171  | 1.269873  | 1.560013  | 15              | 3.122004  | 12.575075 | 1.435922  |
| 8               | -2.234357 | 0.559946  | 3.426440  | 6               | 0.469923  | 13.063775 | 0.659026  |
| 1               | -2.155051 | 1.205967  | 2.698397  | 1               | 0.516765  | 14.047341 | 1.131566  |
| 1               | -2.177779 | -0.272122 | 2.914351  | 1               | -0.275777 | 13.097443 | -0.144874 |
| 44              | 0.112625  | -0.169201 | -1.072575 | 1               | 0.168783  | 12.323794 | 1.409095  |
| 15              | -2.411233 | -1.556654 | -0.019322 | 6               | 1.823924  | 12.636758 | 0.068091  |
| 15              | -2.395286 | 1.525803  | -0.559528 | 8               | 3.798358  | 13.283551 | -1.801325 |
| 6               | -4.498960 | 0.198200  | 0.733410  | 8               | 2.501413  | 15.247386 | -0.733559 |
| 1               | -4.041807 | 0.409156  | 1.702858  | 8               | 1.270511  | 13.564426 | -2.423120 |
| 1               | -5.108788 | -0.708632 | 0.826283  | 8               | 4.508272  | 12.216605 | 0.679139  |

|    |          |           |           |                 |           |           |           |
|----|----------|-----------|-----------|-----------------|-----------|-----------|-----------|
| 8  | 3.249608 | 14.120192 | 1.876173  | H2ORu3-Ru3H2OM1 |           |           |           |
| 8  | 2.715914 | 11.615200 | 2.536538  | 44              | -0.059039 | 1.001815  | 0.343550  |
| 8  | 1.656332 | 11.334634 | -0.538624 | 15              | -2.407020 | -0.565753 | 1.433373  |
| 1  | 1.357869 | 11.555999 | -1.439305 | 15              | -2.427421 | 0.492241  | -1.505797 |
| 8  | 8.164789 | 12.732930 | -1.723433 | 6               | -4.288844 | -1.339010 | -0.507418 |
| 1  | 7.629166 | 13.465655 | -2.087121 | 1               | -3.661056 | -2.153521 | -0.879355 |
| 1  | 8.025171 | 12.895704 | -0.770795 | 1               | -4.872667 | -1.708744 | 0.342398  |
| 44 | 4.200764 | 15.378567 | 0.508150  | 1               | -4.962396 | -1.021075 | -1.308836 |
| 15 | 7.149865 | 15.223551 | 1.348695  | 6               | -3.454137 | -0.127072 | -0.060322 |
| 15 | 6.367231 | 16.425805 | -1.427461 | 8               | -1.443209 | 0.699239  | 1.739323  |
| 6  | 9.023628 | 15.964549 | -0.635997 | 8               | -1.367149 | -1.711152 | 0.957369  |
| 1  | 8.995001 | 14.977863 | -1.103816 | 8               | -3.373904 | -0.900116 | 2.550724  |
| 1  | 9.763025 | 15.943677 | 0.173993  | 8               | -1.454621 | 1.649664  | -0.922023 |
| 1  | 9.317327 | 16.704676 | -1.388623 | 8               | -1.385274 | -0.739096 | -1.765623 |
| 6  | 7.660190 | 16.371825 | -0.056045 | 8               | -3.280315 | 0.864220  | -2.689071 |
| 8  | 5.708326 | 15.691604 | 1.845482  | 8               | -4.342707 | 0.915554  | 0.374669  |
| 8  | 6.959680 | 13.764577 | 0.668575  | 1               | -4.538811 | 0.691820  | 1.300835  |
| 8  | 8.251011 | 15.358181 | 2.398541  | 8               | 0.626494  | 3.263074  | 1.165887  |
| 8  | 4.975970 | 16.800629 | -0.745245 | 1               | 1.158189  | 2.716865  | 1.775588  |
| 8  | 6.258542 | 14.835262 | -1.812423 | 1               | 1.152082  | 3.264834  | 0.345249  |
| 8  | 6.826192 | 17.299353 | -2.578897 | 44              | 0.059077  | -1.001654 | -0.343544 |
| 8  | 7.805296 | 17.678530 | 0.550590  | 15              | 2.407058  | 0.565919  | -1.433364 |
| 1  | 8.118764 | 17.468045 | 1.447417  | 15              | 2.427458  | -0.492077 | 1.505803  |
| 8  | 1.468588 | 16.289847 | 1.707348  | 6               | 4.288879  | 1.339180  | 0.507430  |
| 1  | 1.956474 | 15.522191 | 2.070358  | 1               | 3.661089  | 2.153689  | 0.879368  |
| 1  | 1.548712 | 16.099307 | 0.752089  | 1               | 4.872702  | 1.708917  | -0.342385 |
|    |          |           |           | 1               | 4.962431  | 1.021244  | 1.308848  |



|                 |           |           |           |                 |           |           |           |
|-----------------|-----------|-----------|-----------|-----------------|-----------|-----------|-----------|
| 6               | 3.454175  | 0.127241  | 0.060331  | 8               | -4.321860 | 0.921114  | 0.382966  |
| 8               | 1.443249  | -0.699073 | -1.739314 | 1               | -4.507803 | 0.706594  | 1.312899  |
| 8               | 1.367184  | 1.711316  | -0.957360 | 8               | 0.693798  | 3.416805  | 1.208579  |
| 8               | 3.373941  | 0.900285  | -2.550714 | 1               | 1.195980  | 2.827471  | 1.800114  |
| 8               | 1.454661  | -1.649500 | 0.922027  | 1               | 1.181949  | 3.352915  | 0.368231  |
| 8               | 1.385308  | 0.739257  | 1.765631  | 44              | 0.056810  | -1.108526 | -0.386822 |
| 8               | 3.280353  | -0.864055 | 2.689078  | 15              | 2.392438  | 0.596575  | -1.420140 |
| 8               | 4.342749  | -0.915382 | -0.374660 | 15              | 2.414026  | -0.471609 | 1.504739  |
| 1               | 4.538854  | -0.691645 | -1.300826 | 6               | 4.302041  | 1.331717  | 0.512020  |
| 8               | -0.626438 | -3.262905 | -1.165875 | 1               | 3.682939  | 2.152025  | 0.885650  |
| 1               | -1.158147 | -2.716709 | -1.775576 | 1               | 4.891265  | 1.697087  | -0.335996 |
| 1               | -1.152029 | -3.264687 | -0.345238 | 1               | 4.970832  | 1.003756  | 1.313458  |
| H2ORu3-Ru3H2OM3 |           |           |           | 6               | 3.452233  | 0.132883  | 0.060416  |
| 44              | -0.056784 | 1.108689  | 0.386826  | 8               | 1.455881  | -0.690998 | -1.713301 |
| 15              | -2.392407 | -0.596411 | 1.420147  | 8               | 1.386490  | 1.746835  | -0.896376 |
| 15              | -2.414001 | 0.471770  | -1.504737 | 8               | 3.340099  | 0.941751  | -2.549954 |
| 6               | -4.302018 | -1.331546 | -0.512006 | 8               | 1.461740  | -1.631644 | 0.900608  |
| 1               | -3.682923 | -2.151862 | -0.885631 | 8               | 1.406075  | 0.795887  | 1.723934  |
| 1               | -4.891242 | -1.696908 | 0.336012  | 8               | 3.239987  | -0.836896 | 2.708611  |
| 1               | -4.970807 | -1.003586 | -1.313447 | 8               | 4.321908  | -0.920943 | -0.382954 |
| 6               | -3.452198 | -0.132718 | -0.060410 | 1               | 4.507849  | -0.706452 | -1.312893 |
| 8               | -1.455843 | 0.691156  | 1.713318  | 8               | -0.693675 | -3.416586 | -1.208555 |
| 8               | -1.386461 | -1.746674 | 0.896387  | 1               | -1.195912 | -2.827309 | -1.800101 |
| 8               | -3.340078 | -0.941587 | 2.549954  | 1               | -1.181854 | -3.352766 | -0.368220 |
| 8               | -1.461710 | 1.631806  | -0.900607 |                 |           |           |           |
| 8               | -1.406050 | -0.795726 | -1.723934 | H2ORu3-Ru3H2OM5 |           |           |           |
| 8               | -3.239967 | 0.837056  | -2.708606 | 44              | -0.051638 | 1.105663  | 0.384316  |

|    |           |           |           |    |                |           |           |
|----|-----------|-----------|-----------|----|----------------|-----------|-----------|
| 15 | -2.392595 | -0.595121 | 1.420645  | 8  | 1.389414       | 1.749688  | -0.896974 |
| 15 | -2.412472 | 0.471622  | -1.505474 | 8  | 3.340575       | 0.939314  | -2.550512 |
| 6  | -4.301566 | -1.331839 | -0.510829 | 8  | 1.462478       | -1.632631 | 0.901772  |
| 1  | -3.682839 | -2.151420 | -0.886514 | 8  | 1.408668       | 0.800364  | 1.725245  |
| 1  | -4.888065 | -1.697760 | 0.338825  | 8  | 3.238165       | -0.835414 | 2.710033  |
| 1  | -4.972724 | -1.003802 | -1.310227 | 8  | 4.321073       | -0.921660 | -0.381225 |
| 6  | -3.451283 | -0.132519 | -0.060877 | 1  | 4.509035       | -0.707690 | -1.310852 |
| 8  | -1.452756 | 0.688693  | 1.713805  | 8  | -0.692451      | -3.416839 | -1.212218 |
| 8  | -1.389387 | -1.749524 | 0.896983  | 1  | -1.196112      | -2.826954 | -1.802177 |
| 8  | -3.340547 | -0.939151 | 2.550521  | 1  | -1.181712      | -3.358177 | -0.372239 |
| 8  | -1.462449 | 1.632795  | -0.901763 |    |                |           |           |
| 8  | -1.408641 | -0.800201 | -1.725236 |    |                |           |           |
|    |           |           |           |    | H2ORu3-Ru4OHM2 |           |           |
| 8  | -3.238135 | 0.835578  | -2.710025 | 44 | -0.044706      | 1.108507  | -0.511448 |
| 8  | -4.321041 | 0.921825  | 0.381235  | 15 | -2.491086      | 0.772142  | 1.329256  |
| 1  | -4.508996 | 0.707855  | 1.310863  | 15 | -2.490197      | -0.495597 | -1.507733 |
| 8  | 0.692572  | 3.417041  | 1.212240  | 6  | -4.475779      | -0.974417 | 0.378214  |
| 1  | 1.196198  | 2.827108  | 1.802181  | 1  | -3.909784      | -1.858884 | 0.681838  |
| 1  | 1.181801  | 3.358328  | 0.372245  | 1  | -5.058656      | -0.615574 | 1.233187  |
| 44 | 0.051667  | -1.105497 | -0.384307 | 1  | -5.149776      | -1.245926 | -0.439999 |
| 15 | 2.392623  | 0.595284  | -1.420636 | 6  | -3.541844      | 0.148855  | -0.099675 |
| 15 | 2.412501  | -0.471457 | 1.505483  | 8  | -1.447724      | 1.824840  | 0.691180  |
| 6  | 4.301591  | 1.332006  | 0.510839  | 8  | -1.616715      | -0.501449 | 1.799472  |
| 1  | 3.682862  | 2.151586  | 0.886521  | 8  | -3.443350      | 1.377245  | 2.338591  |
| 1  | 4.888091  | 1.697927  | -0.338815 | 8  | -1.397743      | 0.673043  | -1.821234 |
| 1  | 4.972748  | 1.003971  | 1.310238  | 8  | -1.593775      | -1.625427 | -0.752757 |
| 6  | 3.451311  | 0.132684  | 0.060886  | 8  | -3.281163      | -0.985098 | -2.686682 |
| 8  | 1.452784  | -0.688529 | -1.713797 | 8  | -4.317164      | 1.269485  | -0.549108 |

|                |           |           |           |    |           |           |           |
|----------------|-----------|-----------|-----------|----|-----------|-----------|-----------|
| 1              | -4.505165 | 1.773186  | 0.261273  | 6  | -4.472719 | -0.906240 | -0.302040 |
| 8              | 2.060526  | 3.344769  | -1.643257 | 1  | -3.940677 | -1.808081 | -0.615464 |
| 1              | 1.988120  | 3.156899  | -0.693683 | 1  | -5.061590 | -1.133947 | 0.593152  |
| 1              | 1.992037  | 2.450986  | -2.020947 | 1  | -5.139596 | -0.587129 | -1.108693 |
| 44             | -0.176434 | -1.156896 | 0.543872  | 6  | -3.494333 | 0.237704  | 0.011732  |
| 15             | 2.287546  | -0.771235 | -1.320601 | 8  | -1.333884 | 0.987717  | 1.618276  |
| 15             | 2.294708  | 0.546746  | 1.489298  | 8  | -1.642042 | -1.528678 | 1.116524  |
| 6              | 4.347628  | 0.900992  | -0.385807 | 8  | -3.383577 | -0.242675 | 2.695959  |
| 1              | 3.853981  | 1.798310  | -0.766256 | 8  | -1.338881 | 1.672440  | -1.039781 |
| 1              | 4.949343  | 0.469619  | -1.192890 | 8  | -1.567396 | -0.806130 | -1.589580 |
| 1              | 4.998121  | 1.179002  | 0.448877  | 8  | -3.230073 | 0.905006  | -2.730280 |
| 6              | 3.346058  | -0.156409 | 0.104851  | 8  | -4.222803 | 1.422019  | 0.363428  |
| 8              | 1.226489  | -1.811368 | -0.658676 | 1  | -4.397332 | 1.320861  | 1.315388  |
| 8              | 1.407215  | 0.493040  | -1.794854 | 8  | 2.221024  | 3.621775  | 0.684781  |
| 8              | 3.214631  | -1.419043 | -2.323699 | 1  | 2.141524  | 2.885959  | 1.313526  |
| 8              | 1.220703  | -0.607108 | 1.836126  | 1  | 2.147551  | 3.158829  | -0.166099 |
| 8              | 1.388537  | 1.667668  | 0.700961  | 44 | -0.168500 | -1.283690 | -0.273166 |
| 8              | 3.095156  | 1.089110  | 2.638868  | 15 | 2.322685  | 0.078887  | -1.536548 |
| 8              | 4.061571  | -1.295528 | 0.605003  | 15 | 2.317012  | -0.520453 | 1.511041  |
| 1              | 4.237724  | -1.842256 | -0.178706 | 6  | 4.405504  | 0.828384  | 0.214970  |
| 8              | -0.394656 | -2.850773 | 1.486019  | 1  | 3.937603  | 1.789771  | 0.438909  |
| 1              | -1.110655 | -2.682709 | 2.121917  | 1  | 5.011202  | 0.942830  | -0.690079 |
|                |           |           |           | 1  | 5.047090  | 0.541603  | 1.053641  |
| H2ORu3-Ru4OHM4 |           |           |           | 6  | 3.373880  | -0.285408 | -0.019479 |
| 44             | 0.036699  | 1.223544  | 0.249620  | 8  | 1.280912  | -1.137650 | -1.646888 |
| 15             | -2.447669 | -0.199725 | 1.506976  | 8  | 1.449027  | 1.401667  | -1.143629 |
| 15             | -2.439611 | 0.559413  | -1.500835 | 8  | 3.260193  | 0.218744  | -2.714383 |

|                |           |           |           |               |           |           |           |
|----------------|-----------|-----------|-----------|---------------|-----------|-----------|-----------|
| 8              | 1.199100  | -1.613208 | 1.115974  | 44            | -0.058501 | -1.286273 | 0.344331  |
| 8              | 1.466244  | 0.888936  | 1.550610  | 15            | 2.421088  | -0.553890 | -1.438462 |
| 8              | 3.109919  | -0.791892 | 2.757887  | 15            | 2.446196  | 0.230709  | 1.560839  |
| 8              | 4.061566  | -1.517974 | -0.285929 | 6             | 4.500328  | 0.862157  | -0.214741 |
| 1              | 4.241801  | -1.506686 | -1.239988 | 1             | 3.999855  | 1.814066  | -0.408128 |
| 8              | -0.363046 | -3.172490 | -0.625254 | 1             | 5.095617  | 0.591998  | -1.093758 |
| 1              | -1.078837 | -3.436917 | -0.020571 | 1             | 5.156181  | 0.971536  | 0.654250  |
|                |           |           |           | 6             | 3.482867  | -0.253913 | 0.073749  |
| H2ORu3-Ru4OHM6 |           |           |           | 8             | 1.302988  | -1.653513 | -0.969018 |
| 44             | 0.191411  | 1.318192  | -0.356545 | 8             | 1.590743  | 0.787874  | -1.705255 |
| 15             | -2.292318 | 0.546204  | 1.441946  | 8             | 3.323763  | -1.075529 | -2.532948 |
| 15             | -2.318805 | -0.103965 | -1.589913 | 8             | 1.320112  | -0.948164 | 1.685109  |
| 6              | -4.417550 | -0.782573 | 0.151614  | 8             | 1.670009  | 1.533960  | 0.995989  |
| 1              | -3.974364 | -1.768173 | 0.309859  | 8             | 3.259480  | 0.453132  | 2.805781  |
| 1              | -5.011950 | -0.524236 | 1.034932  | 8             | 4.170387  | -1.485904 | 0.333802  |
| 1              | -5.065871 | -0.825820 | -0.728307 | 1             | 4.366761  | -1.846106 | -0.547833 |
| 6              | -3.360553 | 0.307416  | -0.079807 | 8             | -2.303061 | -3.599694 | 0.755769  |
| 8              | -1.170690 | 1.631076  | 1.039141  | 1             | -2.197665 | -3.141061 | -0.094790 |
| 8              | -1.488188 | -0.853753 | 1.655865  | 1             | -2.251189 | -2.860334 | 1.382627  |
| 8              | -3.191616 | 0.987519  | 2.573798  |               |           |           |           |
| 8              | -1.264373 | 1.094831  | -1.728251 | HORu4-Ru4OHM1 |           |           |           |
| 8              | -1.467227 | -1.407666 | -1.022871 | 44            | -0.134204 | 1.563462  | 0.160582  |
| 8              | -3.146102 | -0.434555 | -2.801634 | 15            | -2.298474 | -0.561425 | 1.388350  |
| 8              | -4.018496 | 1.564673  | -0.298842 | 15            | -2.332692 | 0.617049  | -1.417231 |
| 1              | -4.203669 | 1.909661  | 0.590460  | 6             | -4.107263 | -1.391371 | -0.621880 |
| 8              | 0.411394  | 3.187868  | -0.734542 | 1             | -3.401393 | -2.123860 | -1.021987 |
| 1              | 1.172293  | 3.432375  | -0.178081 | 1             | -4.677561 | -1.859375 | 0.188417  |

|    |           |           |           |    |           |           |           |
|----|-----------|-----------|-----------|----|-----------|-----------|-----------|
| 1  | -4.788123 | -1.092175 | -1.423331 | 1  | -0.731024 | -3.620785 | -0.203163 |
| 6  | -3.395008 | -0.145382 | -0.077716 | 8  | 0.014454  | 3.272574  | 0.867686  |
| 8  | -1.223419 | 0.665740  | 1.496962  | 1  | 0.724512  | 3.201536  | 1.536298  |
| 8  | -1.487684 | -1.877440 | 1.032887  |    |           |           |           |
| 8  | -3.230063 | -0.580756 | 2.588266  |    |           |           |           |
| 8  | -1.815617 | 2.050422  | -1.004874 | 44 | -0.037624 | 1.399106  | 0.089799  |
| 8  | -0.817848 | -0.156917 | -1.118608 | 15 | -2.434469 | -0.169733 | 1.515033  |
| 8  | -2.851590 | 0.341481  | -2.799550 | 15 | -2.398160 | 0.869358  | -1.367245 |
| 8  | -4.362022 | 0.798475  | 0.390720  | 6  | -4.293702 | -0.957823 | -0.480922 |
| 1  | -4.390438 | 0.636140  | 1.354058  | 1  | -3.638934 | -1.752513 | -0.848984 |
| 44 | 0.166037  | -1.509410 | -0.206058 | 1  | -4.889761 | -1.351781 | 0.349462  |
| 15 | 2.400586  | 0.290895  | -1.482003 | 1  | -4.956797 | -0.646611 | -1.292738 |
| 15 | 2.301991  | -0.019971 | 1.608832  | 6  | -3.498414 | 0.258420  | 0.015898  |
| 6  | 4.486868  | 1.083903  | 0.276111  | 8  | -1.334215 | 1.021000  | 1.541038  |
| 1  | 4.037972  | 2.067450  | 0.442216  | 8  | -1.707159 | -1.561750 | 1.232028  |
| 1  | 5.101694  | 1.121748  | -0.627575 | 8  | -3.391307 | -0.109446 | 2.693297  |
| 1  | 5.104711  | 0.826871  | 1.142273  | 8  | -1.599977 | 2.195186  | -0.964768 |
| 6  | 3.403375  | 0.025680  | 0.091440  | 8  | -1.042011 | -0.126879 | -1.098289 |
| 8  | 1.700703  | -1.151426 | -1.555855 | 8  | -3.008426 | 0.743754  | -2.731688 |
| 8  | 1.247860  | 1.422138  | -1.198907 | 8  | -4.396081 | 1.285786  | 0.440232  |
| 8  | 3.257342  | 0.691377  | -2.656757 | 1  | -4.442088 | 1.160599  | 1.408681  |
| 8  | 1.202427  | -1.264009 | 1.347373  | 44 | -0.107192 | -1.516449 | -0.101823 |
| 8  | 1.417773  | 1.297150  | 1.521817  | 15 | 2.228942  | -0.096249 | -1.579654 |
| 8  | 3.059214  | -0.252356 | 2.889939  | 15 | 2.300277  | -0.483340 | 1.500267  |
| 8  | 4.051456  | -1.245116 | -0.068858 | 6  | 4.250929  | 0.905301  | 0.106761  |
| 1  | 3.406751  | -1.793612 | -0.549039 | 1  | 3.688648  | 1.821442  | 0.303262  |
| 8  | 0.019136  | -3.279697 | -0.728975 | 1  | 4.818139  | 1.035859  | -0.820809 |

HORu4-Ru4OHM3



|    |           |           |           |    |               |           |           |
|----|-----------|-----------|-----------|----|---------------|-----------|-----------|
| 44 | -0.057552 | 1.096127  | -0.340557 | 8  | 1.166672      | -1.784130 | -0.688935 |
| 15 | -2.549143 | 0.747587  | 1.357730  | 8  | 1.336131      | 0.534656  | -1.712716 |
| 15 | -2.414573 | -0.515660 | -1.490395 | 8  | 3.121236      | -1.371908 | -2.369684 |
| 6  | -4.441333 | -1.034785 | 0.341202  | 8  | 1.322673      | -0.619212 | 1.917919  |
| 1  | -3.863521 | -1.893599 | 0.692025  | 8  | 1.457919      | 1.629437  | 0.694621  |
| 1  | -5.081523 | -0.682746 | 1.157246  | 8  | 3.208480      | 1.105163  | 2.604733  |
| 1  | -5.062771 | -1.340058 | -0.506019 | 8  | 4.075992      | -1.341348 | 0.506322  |
| 6  | -3.523795 | 0.115507  | -0.112728 | 1  | 4.246568      | -1.840692 | -0.310162 |
| 8  | -1.486671 | 1.819137  | 0.671480  | 8  | -0.350234     | -2.547708 | 1.697452  |
| 8  | -1.671470 | -0.441997 | 1.898017  |    |               |           |           |
| 8  | -3.524603 | 1.448218  | 2.279737  |    | H2ORu3-Ru5OM3 |           |           |
| 8  | -1.340887 | 0.685337  | -1.741037 | 44 | 0.037208      | -1.325166 | 0.123253  |
| 8  | -1.505672 | -1.656114 | -0.775850 | 15 | -2.435387     | -0.269009 | -1.503804 |
| 8  | -3.181121 | -0.988505 | -2.692776 | 15 | -2.441559     | -0.050232 | 1.586607  |
| 8  | -4.314127 | 1.209096  | -0.596455 | 6  | -4.475671     | 0.951599  | -0.025468 |
| 1  | -4.516758 | 1.729160  | 0.200418  | 1  | -3.947889     | 1.908457  | -0.030604 |
| 8  | 2.069513  | 3.368646  | -1.577440 | 1  | -5.070431     | 0.869517  | -0.941615 |
| 1  | 2.001122  | 3.145163  | -0.635131 | 1  | -5.136171     | 0.909991  | 0.845928  |
| 1  | 1.920793  | 2.497907  | -1.983828 | 6  | -3.490068     | -0.225944 | 0.045062  |
| 44 | -0.177090 | -1.259936 | 0.632237  | 8  | -1.328213     | -1.443595 | -1.243028 |
| 15 | 2.237444  | -0.739925 | -1.317982 | 8  | -1.615432     | 1.104160  | -1.537672 |
| 15 | 2.370881  | 0.492230  | 1.515922  | 8  | -3.353287     | -0.588776 | -2.662260 |
| 6  | 4.362706  | 0.881111  | -0.432171 | 8  | -1.334787     | -1.250210 | 1.487929  |
| 1  | 3.863259  | 1.786637  | -0.785690 | 8  | -1.621418     | 1.306672  | 1.266206  |
| 1  | 4.938000  | 0.457876  | -1.262815 | 8  | -3.234942     | -0.035880 | 2.862279  |
| 1  | 5.039063  | 1.143449  | 0.386886  | 8  | -4.205232     | -1.468631 | 0.078948  |
| 6  | 3.365132  | -0.170818 | 0.072611  | 1  | -4.391437     | -1.665563 | -0.855257 |

|               |           |           |           |    |           |           |           |
|---------------|-----------|-----------|-----------|----|-----------|-----------|-----------|
| 8             | 2.327471  | -3.672470 | 0.295625  | 1  | -5.062442 | -0.890173 | 0.913944  |
| 1             | 2.205371  | -3.127230 | -0.498706 | 1  | -5.128085 | -0.880116 | -0.873998 |
| 1             | 2.231324  | -3.012339 | 1.001166  | 6  | -3.482537 | 0.233370  | -0.040994 |
| 44            | -0.189816 | 1.421356  | -0.128907 | 8  | -1.325804 | 1.418766  | 1.283955  |
| 15            | 2.295604  | 0.336717  | 1.500319  | 8  | -1.617537 | -1.146942 | 1.505533  |
| 15            | 2.301255  | 0.108936  | -1.591693 | 8  | -3.346416 | 0.518905  | 2.676195  |
| 6             | 4.407612  | -0.810087 | 0.022756  | 8  | -1.323334 | 1.296352  | -1.447228 |
| 1             | 3.962644  | -1.806947 | 0.056032  | 8  | -1.620147 | -1.272083 | -1.307069 |
| 1             | 5.007323  | -0.670023 | 0.928396  | 8  | -3.219895 | 0.129806  | -2.862186 |
| 1             | 5.050278  | -0.739148 | -0.859672 | 8  | -4.197482 | 1.476284  | -0.042240 |
| 6             | 3.353946  | 0.304792  | -0.050511 | 1  | -4.385205 | 1.647432  | 0.896685  |
| 8             | 1.228070  | 1.518841  | 1.271331  | 8  | 2.373151  | 3.679111  | -0.183387 |
| 8             | 1.454428  | -1.058236 | 1.492057  | 1  | 2.246636  | 3.118556  | 0.599135  |
| 8             | 3.212123  | 0.559938  | 2.681047  | 1  | 2.270159  | 3.035691  | -0.903469 |
| 8             | 1.225991  | 1.304237  | -1.533772 | 44 | -0.201141 | -1.458225 | 0.088730  |
| 8             | 1.453941  | -1.259068 | -1.236437 | 15 | 2.286111  | -0.293706 | -1.507484 |
| 8             | 3.106470  | -0.001974 | -2.855789 | 15 | 2.291730  | -0.170979 | 1.585368  |
| 8             | 4.015706  | 1.577689  | -0.110098 | 6  | 4.409260  | 0.786725  | 0.006300  |
| 1             | 4.204424  | 1.807953  | 0.814362  | 1  | 3.973602  | 1.788069  | 0.009492  |
| 8             | -0.327676 | 3.166631  | -0.260583 | 1  | 5.006060  | 0.673929  | -0.905023 |
|               |           |           |           | 1  | 5.052873  | 0.678816  | 0.884239  |
| H2ORu3-Ru5OM5 |           |           |           | 6  | 3.346755  | -0.321193 | 0.041647  |
| 44            | 0.045536  | 1.377841  | -0.083570 | 8  | 1.215465  | -1.480481 | -1.316712 |
| 15            | -2.428877 | 0.232998  | 1.508600  | 8  | 1.462688  | 1.111382  | -1.453662 |
| 15            | -2.431343 | 0.099778  | -1.583969 | 8  | 3.198527  | -0.484404 | -2.697043 |
| 6             | -4.467632 | -0.946353 | -0.004087 | 8  | 1.217613  | -1.364875 | 1.486928  |
| 1             | -3.939760 | -1.902818 | -0.025874 | 8  | 1.452303  | 1.212966  | 1.274017  |



|                 |           |           |           |                 |           |           |           |
|-----------------|-----------|-----------|-----------|-----------------|-----------|-----------|-----------|
| 8               | 3.092012  | -0.101861 | 2.855438  | 1               | 3.802451  | 1.670686  | 0.622800  |
| 8               | 3.998615  | -1.600026 | 0.060080  | 1               | 4.959023  | 1.016157  | -0.570035 |
| 1               | 4.178346  | -1.806596 | -0.871667 | 1               | 5.039994  | 0.500243  | 1.142010  |
| 8               | -0.355378 | -3.200718 | 0.166699  | 6               | 3.436281  | -0.405263 | 0.020968  |
|                 |           |           |           | 8               | 1.302782  | -1.215314 | -1.612507 |
|                 |           |           |           | 8               | 1.644902  | 1.341179  | -1.237652 |
| H2ORu3-Ru3OOHM1 |           |           |           | 8               | 3.409477  | -0.073537 | -2.663038 |
| 44              | 0.102434  | 1.120612  | 0.226636  | 8               | 1.328064  | -1.888056 | 1.039103  |
| 15              | -2.403967 | -0.220958 | 1.563108  | 8               | 1.523534  | 0.606679  | 1.674064  |
| 15              | -2.325816 | 0.283088  | -1.550032 | 8               | 3.207510  | -1.128380 | 2.744120  |
| 6               | -4.642712 | -0.571657 | -0.172151 | 8               | 4.239991  | -1.551046 | -0.325266 |
| 1               | -4.377332 | -1.615476 | -0.365707 | 1               | 4.352237  | -1.442234 | -1.288806 |
| 1               | -5.244887 | -0.522796 | 0.741453  | 8               | -2.745594 | -3.534036 | -0.584792 |
| 1               | -5.212983 | -0.187650 | -1.025423 | 1               | -2.435665 | -2.863277 | -1.222228 |
| 6               | -3.385607 | 0.266287  | 0.017692  | 1               | -2.484297 | -3.076830 | 0.238006  |
| 8               | -1.422456 | 1.022794  | 1.681963  | 8               | 1.604401  | 3.532853  | 0.270833  |
| 8               | -1.563878 | -1.546213 | 1.097932  | 1               | 1.867590  | 2.863486  | -0.411649 |
| 8               | -3.316402 | -0.497609 | 2.742943  |                 |           |           |           |
| 8               | -1.202052 | 1.397512  | -1.263361 |                 |           |           |           |
| 8               | -1.497553 | -1.127521 | -1.531738 | H2ORu3-Ru3OOHM3 |           |           |           |
| 8               | -3.160220 | 0.487099  | -2.797696 | 44              | 0.168710  | 1.165580  | 0.202971  |
| 8               | -3.795268 | 1.632989  | 0.249307  | 15              | -2.365025 | -0.003859 | 1.544599  |
| 1               | -3.004707 | 2.049128  | 0.637117  | 15              | -2.342564 | 0.440951  | -1.534874 |
| 8               | 0.393604  | 2.915585  | 0.777555  | 6               | -4.506918 | -0.716827 | -0.161296 |
| 44              | -0.050296 | -1.368909 | -0.179047 | 1               | -4.097507 | -1.711150 | -0.352484 |
| 15              | 2.405879  | -0.026462 | -1.509919 | 1               | -5.111265 | -0.758088 | 0.752981  |
| 15              | 2.381823  | -0.715533 | 1.544299  | 1               | -5.137245 | -0.424806 | -1.008520 |
| 6               | 4.367860  | 0.784455  | 0.324496  | 6               | -3.409249 | 0.343213  | 0.016177  |

|    |           |           |           |                 |           |           |           |
|----|-----------|-----------|-----------|-----------------|-----------|-----------|-----------|
| 8  | -1.282931 | 1.173281  | 1.608675  | 1               | -2.367342 | -3.101843 | 0.269632  |
| 8  | -1.577237 | -1.390307 | 1.243958  | 8               | 1.665507  | 3.633926  | -0.063607 |
| 8  | -3.329496 | -0.018841 | 2.724322  | 1               | 1.925751  | 2.880190  | -0.644923 |
| 8  | -1.212483 | 1.535525  | -1.215359 |                 |           |           |           |
| 8  | -1.612298 | -1.013324 | -1.512333 |                 |           |           |           |
|    |           |           |           | H2ORu3-Ru3OOHM5 |           |           |           |
| 8  | -3.177656 | 0.693551  | -2.773272 | 44              | 0.174389  | 1.157109  | 0.164256  |
| 8  | -4.050238 | 1.615933  | 0.258335  | 15              | -2.365804 | 0.032750  | 1.538031  |
| 1  | -4.162291 | 1.639694  | 1.223204  | 15              | -2.352884 | 0.418957  | -1.545943 |
| 8  | 0.458344  | 3.112771  | 0.532498  | 6               | -4.513057 | -0.714182 | -0.144760 |
| 44 | -0.124254 | -1.302445 | -0.152862 | 1               | -4.102261 | -1.711520 | -0.316170 |
| 15 | 2.410896  | -0.138175 | -1.512770 | 1               | -5.115873 | -0.737629 | 0.771220  |
| 15 | 2.378333  | -0.669944 | 1.548828  | 1               | -5.145878 | -0.440387 | -0.996221 |
| 6  | 4.421680  | 0.714913  | 0.246450  | 6               | -3.416636 | 0.351120  | 0.008359  |
| 1  | 3.879724  | 1.636601  | 0.471905  | 8               | -1.269894 | 1.202961  | 1.568876  |
| 1  | 5.033311  | 0.865802  | -0.652082 | 8               | -1.591418 | -1.363305 | 1.264622  |
| 1  | 5.070272  | 0.468016  | 1.094180  | 8               | -3.322564 | 0.061709  | 2.723668  |
| 6  | 3.452622  | -0.457942 | 0.015180  | 8               | -1.224110 | 1.518433  | -1.243170 |
| 8  | 1.269849  | -1.280349 | -1.555498 | 8               | -1.620088 | -1.033584 | -1.495960 |
| 8  | 1.659999  | 1.255514  | -1.254979 | 8               | -3.187730 | 0.648198  | -2.788783 |
| 8  | 3.375660  | -0.214547 | -2.692519 | 8               | -4.058118 | 1.627037  | 0.228641  |
| 8  | 1.296864  | -1.802944 | 1.175743  | 1               | -4.165733 | 1.668080  | 1.193625  |
| 8  | 1.611025  | 0.750053  | 1.553137  | 8               | 0.473475  | 3.126189  | 0.416944  |
| 8  | 3.214347  | -0.949008 | 2.781094  | 44              | -0.130448 | -1.290744 | -0.136843 |
| 8  | 4.216463  | -1.647860 | -0.275544 | 15              | 2.408080  | -0.190165 | -1.522105 |
| 1  | 4.348047  | -1.588630 | -1.239311 | 15              | 2.373162  | -0.637588 | 1.552530  |
| 8  | -2.534355 | -3.537240 | -0.584609 | 6               | 4.406569  | 0.731213  | 0.218177  |
| 1  | -2.325448 | -2.792715 | -1.184969 | 1               | 3.856491  | 1.654064  | 0.418463  |

|                |           |           |           |    |           |           |           |
|----------------|-----------|-----------|-----------|----|-----------|-----------|-----------|
| 1              | 5.017620  | 0.862812  | -0.683744 | 8  | 1.573597  | -1.139846 | -1.477087 |
| 1              | 5.056988  | 0.512941  | 1.072380  | 8  | 3.295276  | 0.518290  | -2.681024 |
| 6              | 3.448920  | -0.456624 | 0.017245  | 8  | 1.242599  | 1.304924  | 1.493755  |
| 8              | 1.273947  | -1.335037 | -1.540187 | 8  | 1.572535  | -1.257244 | 1.290052  |
| 8              | 1.651286  | 1.209248  | -1.294200 | 8  | 3.194675  | 0.121748  | 2.846609  |
| 8              | 3.378033  | -0.282649 | -2.696213 | 8  | 4.060681  | 1.619380  | 0.032950  |
| 8              | 1.288122  | -1.772243 | 1.201512  | 1  | 4.157827  | 1.821795  | -0.912809 |
| 8              | 1.599980  | 0.783775  | 1.529115  | 8  | -0.393999 | 3.202618  | 0.153107  |
| 8              | 3.204733  | -0.886601 | 2.793533  | 44 | 0.103910  | -1.280606 | -0.076745 |
| 8              | 4.223039  | -1.648281 | -0.236149 | 15 | -2.396697 | -0.438644 | 1.502209  |
| 1              | 4.359264  | -1.615082 | -1.200422 | 15 | -2.403193 | -0.307437 | -1.607739 |
| 8              | -2.533481 | -3.543424 | -0.498158 | 6  | -4.371438 | 0.834609  | -0.010236 |
| 1              | -2.330682 | -2.820878 | -1.125675 | 1  | -3.783202 | 1.755925  | -0.024014 |
| 1              | -2.362874 | -3.076686 | 0.339271  | 1  | -4.973282 | 0.804661  | 0.906615  |
| 8              | 1.757720  | 3.583783  | -0.079359 | 1  | -5.035078 | 0.810289  | -0.882409 |
| 1              | 1.994423  | 2.840995  | -0.681123 | 6  | -3.453782 | -0.400715 | -0.051160 |
|                |           |           |           | 8  | -1.284835 | -1.602146 | 1.287410  |
| H2ORu3-Ru4OOM2 |           |           |           | 8  | -1.616799 | 0.951942  | 1.527911  |
| 44             | -0.200681 | 1.153377  | 0.068449  | 8  | -3.360810 | -0.761880 | 2.640024  |
| 15             | 2.342485  | 0.287490  | -1.514072 | 8  | -1.287099 | -1.480332 | -1.465739 |
| 15             | 2.349515  | 0.157349  | 1.590928  | 8  | -1.620115 | 1.079482  | -1.358536 |
| 6              | 4.492797  | -0.754266 | 0.005899  | 8  | -3.233716 | -0.377446 | -2.870476 |
| 1              | 4.075391  | -1.763413 | 0.014327  | 8  | -4.253358 | -1.600963 | -0.016260 |
| 1              | 5.086347  | -0.630993 | -0.908028 | 1  | -4.370011 | -1.748372 | 0.940350  |
| 1              | 5.136033  | -0.629422 | 0.883920  | 8  | 2.499301  | -3.586670 | -0.149862 |
| 6              | 3.406453  | 0.330605  | 0.040396  | 1  | 2.302044  | -3.005493 | 0.609211  |
| 8              | 1.242962  | 1.432369  | -1.329739 | 1  | 2.327870  | -2.960256 | -0.876863 |

|                |           |           |           |                |           |           |           |
|----------------|-----------|-----------|-----------|----------------|-----------|-----------|-----------|
| 8              | -1.597528 | 3.700050  | 0.173741  | 6              | 3.456260  | -0.403480 | 0.050850  |
|                |           |           |           | 8              | 1.293655  | -1.615278 | -1.288692 |
| H2ORu3-Ru4OOM4 |           |           |           | 8              | 1.610929  | 0.941443  | -1.521485 |
| 44             | 0.194417  | 1.134405  | -0.069945 | 8              | 3.363521  | -0.755746 | -2.642753 |
| 15             | -2.345649 | 0.278695  | 1.512521  | 8              | 1.295526  | -1.488512 | 1.469864  |
| 15             | -2.351961 | 0.143599  | -1.592076 | 8              | 1.614277  | 1.072656  | 1.349149  |
| 6              | -4.496235 | -0.759465 | -0.006948 | 8              | 3.235100  | -0.363430 | 2.870159  |
| 1              | -4.079183 | -1.768855 | -0.012852 | 8              | 4.260890  | -1.600865 | 0.018391  |
| 1              | -5.091138 | -0.633775 | 0.905815  | 1              | 4.380573  | -1.749005 | -0.937529 |
| 1              | -5.138535 | -0.635557 | -0.885854 | 8              | -2.499103 | -3.583889 | 0.153696  |
| 6              | -3.408454 | 0.324278  | -0.042384 | 1              | -2.298270 | -3.002463 | -0.604711 |
| 8              | -1.241028 | 1.423972  | 1.323453  | 1              | -2.323603 | -2.958020 | 0.880494  |
| 8              | -1.579402 | -1.145114 | 1.481854  | 8              | 1.591362  | 3.718713  | -0.180220 |
| 8              | -3.296893 | 0.526903  | 2.677291  |                |           |           |           |
| 8              | -1.239747 | 1.292245  | -1.491951 | H2ORu3-Ru4OOM6 |           |           |           |
| 8              | -1.579412 | -1.267619 | -1.293664 | 44             | 0.192405  | 1.132670  | -0.069762 |
| 8              | -3.194831 | 0.123428  | -2.849594 | 15             | -2.344101 | 0.276812  | 1.512146  |
| 8              | -4.059848 | 1.614227  | -0.035826 | 15             | -2.349480 | 0.142645  | -1.592570 |
| 1              | -4.157237 | 1.816164  | 0.910148  | 6              | -4.490189 | -0.771282 | -0.007717 |
| 8              | 0.391168  | 3.223725  | -0.162150 | 1              | -4.069409 | -1.779106 | -0.013122 |
| 44             | -0.101196 | -1.275582 | 0.076514  | 1              | -5.086016 | -0.647662 | 0.904683  |
| 15             | 2.397564  | -0.450223 | -1.501653 | 1              | -5.132545 | -0.650058 | -0.886922 |
| 15             | 2.403665  | -0.314251 | 1.606806  | 6              | -3.406896 | 0.316863  | -0.042881 |
| 6              | 4.370796  | 0.833755  | 0.008230  | 8              | -1.241785 | 1.423512  | 1.322197  |
| 1              | 3.780996  | 1.753950  | 0.021502  | 8              | -1.571975 | -1.145594 | 1.481873  |
| 1              | 4.972177  | 0.804610  | -0.908951 | 8              | -3.295659 | 0.519843  | 2.677209  |
| 1              | 5.034699  | 0.812035  | 0.880258  | 8              | -1.239922 | 1.293283  | -1.489968 |

|    |           |           |           |     |           |           |           |
|----|-----------|-----------|-----------|-----|-----------|-----------|-----------|
| 8  | -1.570348 | -1.267055 | -1.295689 | 8   | 1.614918  | 1.073170  | 1.348494  |
| 8  | -3.191650 | 0.118734  | -2.850130 | 8   | 3.234714  | -0.365972 | 2.869511  |
| 8  | -4.063461 | 1.603915  | -0.037662 | 8   | 4.258318  | -1.602379 | 0.017105  |
| 1  | -4.160133 | 1.808677  | 0.907690  | 1   | 4.378675  | -1.749896 | -0.938825 |
| 8  | 0.366140  | 3.251496  | -0.153176 | 8   | -2.484671 | -3.589895 | 0.158298  |
| 44 | -0.098096 | -1.274715 | 0.076406  | 1   | -2.288419 | -3.013969 | -0.605035 |
| 15 | 2.397025  | -0.447335 | -1.502802 | 1   | -2.310546 | -2.957877 | 0.880176  |
| 15 | 2.403618  | -0.312105 | 1.606416  | 8   | 1.576412  | 3.741153  | -0.178214 |
| 6  | 4.369560  | 0.833159  | 0.007535  |     |           |           |           |
| 1  | 3.779425  | 1.753243  | 0.020539  | H2O |           |           |           |
| 1  | 4.971290  | 0.803964  | -0.909395 | 8   | 0.000000  | 0.000000  | 0.118847  |
| 1  | 5.033255  | 0.811538  | 0.879697  | 1   | 0.000000  | 0.760065  | -0.475390 |
| 6  | 3.455021  | -0.404382 | 0.049994  | 1   | -0.000000 | -0.760065 | -0.475390 |
| 8  | 1.289948  | -1.612612 | -1.290417 |     |           |           |           |
| 8  | 1.610604  | 0.942797  | -1.521655 | O2  |           |           |           |
| 8  | 3.361388  | -0.757094 | -2.643745 | 8   | -0.485856 | 0.006402  | 0.000000  |
| 8  | 1.292520  | -1.486714 | 1.470811  | 8   | -1.700072 | 0.006402  | 0.000000  |

## References

- S1 X. Y. Yi, L. M. Zheng, W. Xu and S. Feng, *Inorg. Chem.*, 2003, **42**, 2827.
- S2 X. Y. Yi, B. Liu, R. Jiménez-Aparicio, F. A. Urbanos, S. Gao, W. Xu, J. S. Chen, Y. Song and L. M. Zheng, *Inorg. Chem.*, 2005, **44**, 4309.
- S3 F. Yu, F. Li, J. Hu, L. Bai, Y. Zhu and L. Sun, *Chem. Commun.*, 2016, **52**, 10377.
- S4 A. J. Bard and L. R. Faulkner, *Electrochemical methods: fundamental and applications*, Wiley, New York, 2001.
- S5 S. M. George, *Acta. Cryst.*, 2015, **A71**, 3.
- S6 M. J. Frisch, G. W. Trucks, H. B. Schlegel, G. E. Scuseria, M. A. Robb, J. R. Cheeseman, G. Scalmani, V. Barone, B. Mennucci, G. A. Petersson, H. Nakatsuji; M. Caricato, X. Li, H. P. Hratchian, A. F. Izmaylov, J. Bloino, G. Zheng, J. L. Sonnenberg, M. Hada, M. Ehara, K. Toyota, R. Fukuda, J. Hasegawa, M. Ishida, T. Nakajima, Y. Honda, O. Kitao, H. Nakai, T. Vreven, J. A. Jr. Montgomery, J. E. Peralta, F. Ogliaro, M. Bearpark, J. J. Heyd, E. Brothers, K. N. Kudin, V. N. Staroverov, T. Keith, R. Kobayashi, J. Normand, K. Raghavachari, A. Rendell, J. C. Burant, S. S. Iyengar, J. Tomasi, M. Cossi, N. Rega, J. M. Millam, M. Klene, J. E. Knox, J. B. Cross, V. Bakken, C. Adamo, J. Jaramillo, R. Gomperts, R. E. Stratmann, O. Yazyev, A. J. Austin, R. Cammi, C. Pomelli, J. W. Ochterski, R. L. Martin, K. Morokuma, V. G. Zakrzewski, G. A. Voth, P. Salvador, J. J. Dannenberg, S. Dapprich, A. D. Daniels, O. Farkas, J. B. Foresman, J. V. Ortiz, J. Cioslowski and D. J. Fox, *Gaussian 16, Revision B.01*, Gaussian, Inc., Wallingford CT, 2016.
- S7 (a) A. D. Becke, *J. Chem. Phys.*, 1993, **98**, 5648-5652; (b) C. Lee, W. Yang and G. Parr, *Phys. Rev. B.*, 1988, **37**, 785; (c) P. J. Stephens, F. J. Devlin and C. F. Chaobalowski, *J. Phys. Chem.*, 1994, **98**, 11623.

- S8 (a) M. Dolg, U. Wedig, H. Stoll, H. Preuss, *J. Chem. Phys.*, 1987, **86**, 866; (b) P. Schwerdtfeger, M. Dolg, W. H. E. Schwarz, G. A. Bowmaker and P. D. W. Boyd, *J. Chem. Phys.*, 1989, **91**, 1762.
- S9 (a) A. W. Ehlers, M. Böhme, S. Dapprich, A. Gobbi, A. Höllwarth, V. Jonas, K. F. Köhler, R. Stegmann and G. Frenking, *Chem. Phys. Lett.*, 1993, **208**, 111; (b) A. Höllwarth, M. Böhme, S. Dapprich, A. W. Ehlers, A. Gobbi, V. Jonas, K. F. Köhler, R. Stegmann, A. Veldkamp and G. Frenking, *Chem. Phys. Lett.*, 1993, **208**, 237.
- S10 (a) Y. Zhao and D. G. Truhlar, *Theor. Chem. Acc.*, 2008, **120**, 215; (b) Y. Zhao and D. G. Truhlar, *Acc. Chem. Res.*, 2008, **41**, 157.
- S11 A. A. Isse and A. Gennaro, *J. Phys. Chem. B*, 2010, **114**, 7894.
- S12 J. A. Gilbert, D. S. Eggleston, W. R. Murphy, J. D. A. Geselowitz, S. W. Gersten, D. J. Hodgson and T. J. Meyer, *J. Am. Chem. Soc.*, 1985, **107**, 3855.
- S13 T. Funaioli, C. Cavazza, F. Marchetti and G. Fachinetti, *Inorg. Chem.*, 1999, **38**, 3361.
- S14 M. F. Mahon, M. K. Whittlesey and P. T. Wood, *Organometallics*, 1999, **18**, 4068.
- S15 A. V. Marenich, C. J. Cramer and D. G. Truhlar, *J. Phys. Chem. B*, 2009, **113**, 6378.
